# Supplementary material for: Anti-cancer effects of Bifidobacterium species in colon cancer cells and a mouse model of carcinogenesis
Source: PubMed Central journal article supplement (PMC7219778; doi:10.1371/journal.pone.0232930), 2020-05-13
Supplement: pone.0232930.s002.pdf [file pone.0232930.s002.pdf]

S2 Fig.

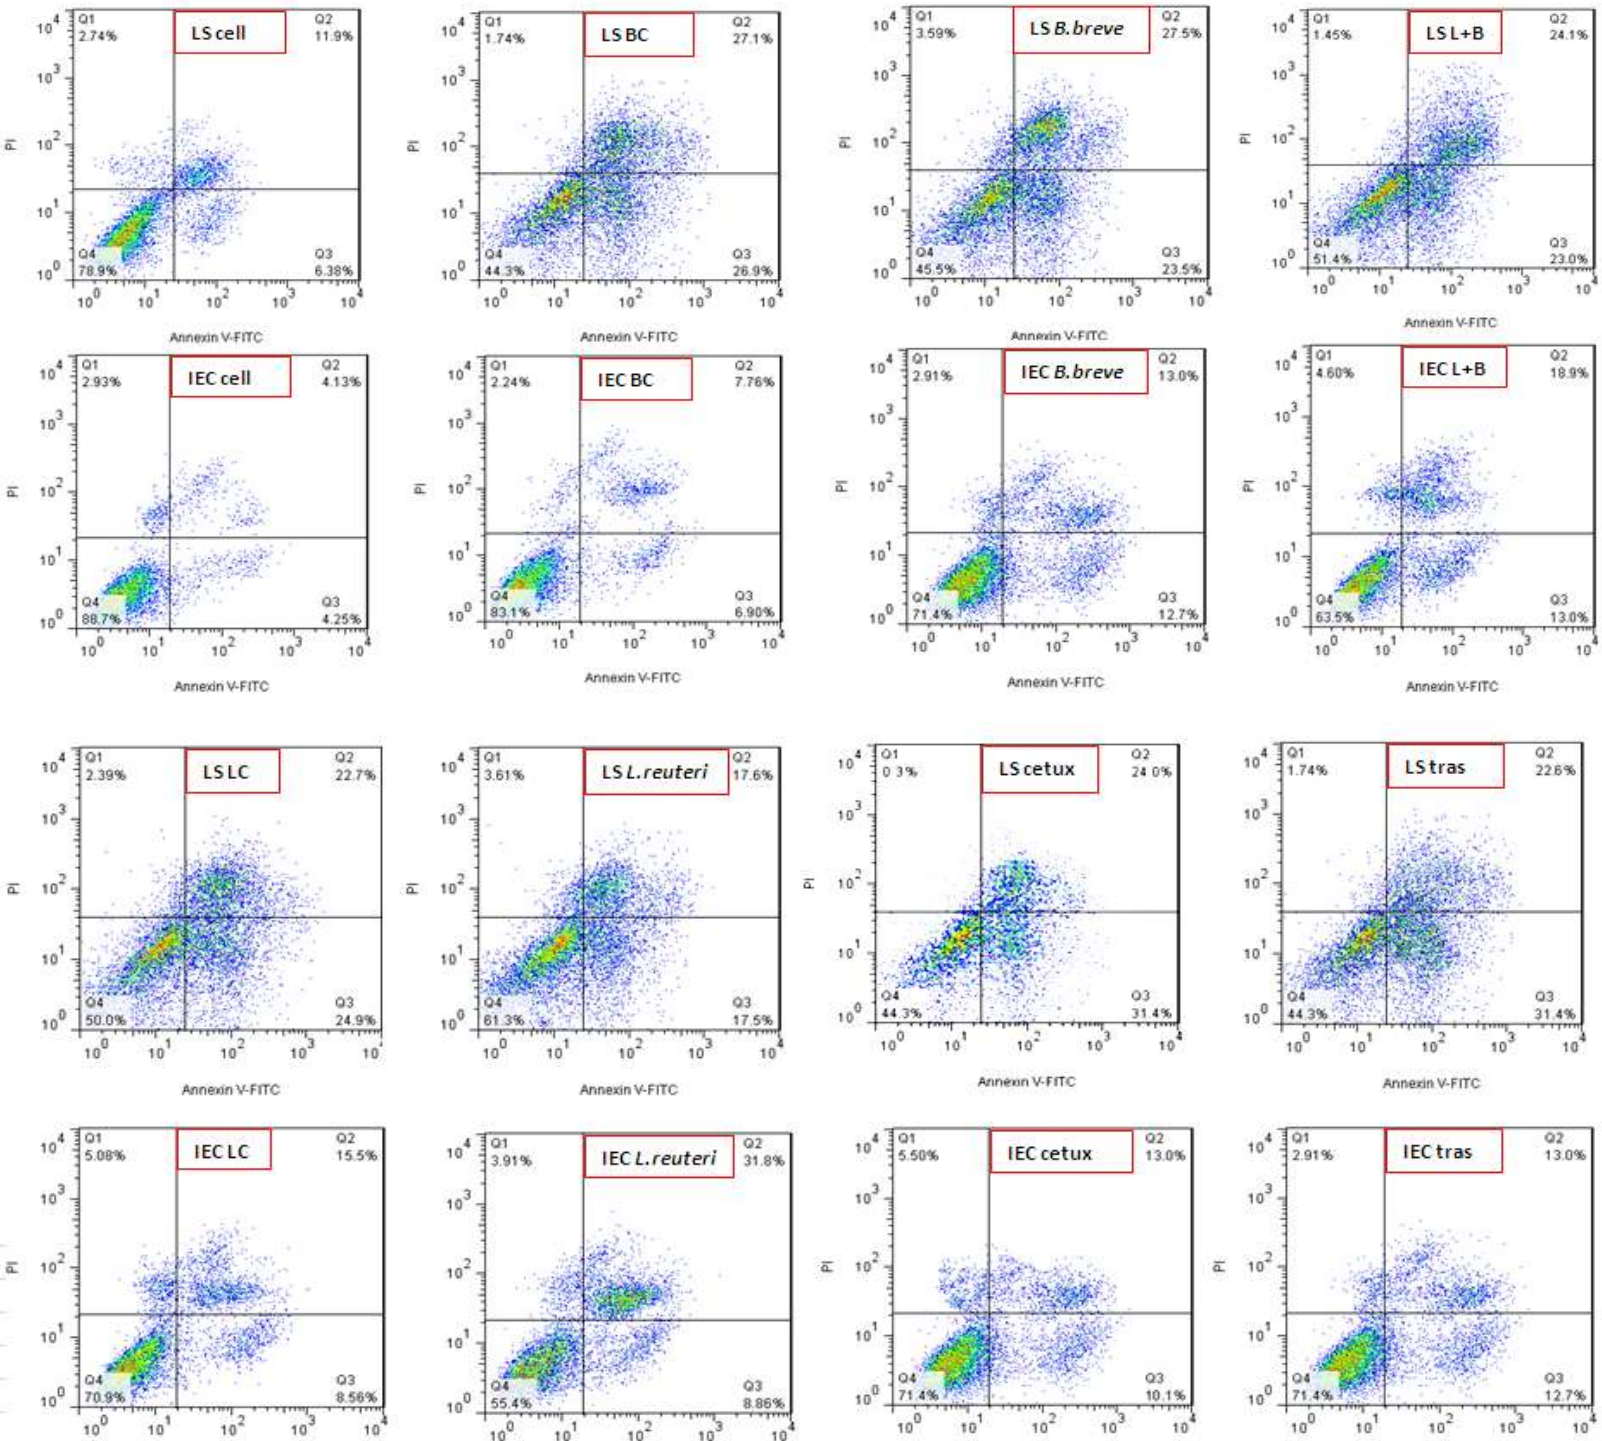

LS: LS174T cancer cells; IEC: IEC-18 normal cells; BC: Bifidobacteria cocktail, LC: Lactobacilli cocktail, L+B: Lactobacilli plus Bifidobacteria cocktail; cetux: cetuximab; tras: trastuzumab
