# Supplementary material for: Anti-cancer effects of Bifidobacterium species in colon cancer cells and a mouse model of carcinogenesis
Source: PubMed Central journal article supplement (PMC7219778; doi:10.1371/journal.pone.0232930), 2020-05-13
Supplement: pone.0232930.s003.pdf [file pone.0232930.s003.pdf]

**S1 Table.**

|              | LS174T cells |                |               |            |            | IEC-18 cells |                |               |         |            |
|--------------|--------------|----------------|---------------|------------|------------|--------------|----------------|---------------|---------|------------|
|              | Control      | Cetux.<br>120h | Tras.<br>120h | BC<br>120h | LC<br>120h | Control      | Cetux.<br>120h | Tras.<br>120h | BC 120h | LC<br>120h |
| <b>EGFR</b>  | 1            | 0.19           | 0.35          | 0.4        | 0.9        | 1            | 0.37           | 0.2           | 0.007   | 0.56       |
| <b>HER-2</b> | 1            | 0.43           | 0.50          | 0.48       | 0.79       | 1            | 5.7            | 5             | 1.4     | 4.9        |
| <b>COX-2</b> | 1            | 0.51           | 0.52          | 0.37       | 0.5        | 1            | 0.4            | 0.2           | 0.7     | 0.005      |

Cetux: cetuximab, Tras: trastuzumab, BC: Bifidobacterial cocktail, LC: Lactobacilli cocktail
